# Supplementary material for: 3-O-Acyl-epicatechins Increase Glucose Uptake Activity and GLUT4 Translocation through Activation of PI3K Signaling in Skeletal Muscle Cells
Source: MDPI journal article supplement (doi:10.3390/ijms160716288), 2015-07-17
Supplement: s1 [file s1]

## Supplementary Information

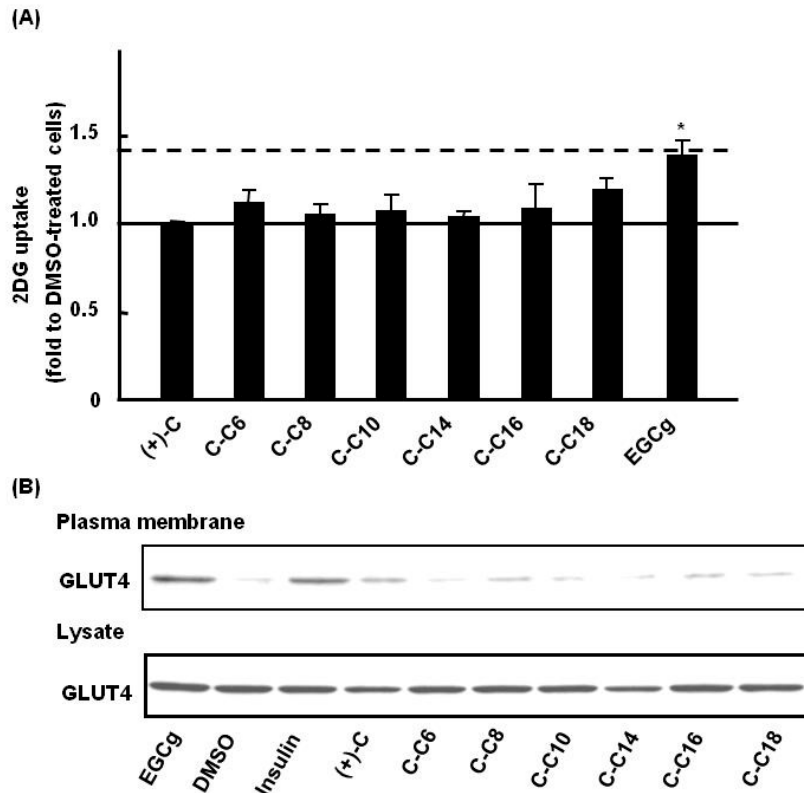

**Figure S1.** Effects of 3-*O*-acylcatechins on glucose uptake activity and GLUT4 translocation in L6 myotubes. Differentiated L6 cells were incubated with 100 nM catechins and 3-*O*-acyl-catechins for 15 min. **(A)** Glucose uptake activity was measured using [<sup>3</sup>H]-2DG as described in the Experimental section. Data are shown as the mean  $\pm$  SE ( $n = 3$ ). \*  $p < 0.05$  vs. DMSO-treated control cells (Dunnett multiple comparison test); **(B)** GLUT4 in the plasma membrane and the cell lysate were detected by Western blot analysis.

**Table S1.** Effects of acyl-catechins on cell viability of L6 myotubes.

| Catechin (M) | Cell Viability (% of DMSO-Treated Cells) |                  |                  |
|--------------|------------------------------------------|------------------|------------------|
|              | 10 <sup>-7</sup>                         | 10 <sup>-6</sup> | 10 <sup>-6</sup> |
| (+)-C        | 100 $\pm$ 1.95                           | 97 $\pm$ 2.86    | 88 $\pm$ 3.66    |
| C-C6         | 96 $\pm$ 2.35                            | 100 $\pm$ 4.53   | 75 $\pm$ 2.17 *  |
| C-C8         | 99 $\pm$ 2.02                            | 94 $\pm$ 1.49    | 49 $\pm$ 2.41 *  |
| C-C10        | 96 $\pm$ 2.70                            | 90 $\pm$ 1.80    | 38 $\pm$ 1.19 *  |
| C-C14        | 89 $\pm$ 3.46                            | 88 $\pm$ 2.78    | 42 $\pm$ 7.67 *  |
| C-C16        | 109 $\pm$ 3.07                           | 97 $\pm$ 2.78    | 77 $\pm$ 1.62 *  |
| C-C18        | 106 $\pm$ 2.05                           | 96 $\pm$ 3.67    | 57 $\pm$ 0.91 *  |
| (-)-EC       | 98 $\pm$ 2.80                            | 96 $\pm$ 3.21    | 101 $\pm$ 3.23   |
| EC-C14       | 101 $\pm$ 6.17                           | 94 $\pm$ 2.03    | 76 $\pm$ 5.49 *  |
| EC-C16       | 103 $\pm$ 1.73                           | 98 $\pm$ 2.67    | 87 $\pm$ 1.86 *  |

Differentiated L6 cells were incubated with the indicated concentration of catechins for 24 h. Cell viability was measured by WST-1 assay. Data are represented as % of control cells treated with 0.1% DMSO and expressed as the means  $\pm$  SE ( $n = 3$ ). Asterisks indicate significant differences from the DMSO-treated control cells,  $p < 0.05$  by Student's *t*-test.
